# Supplementary material for: In Vivo Assessment of Laboratory-Grown Kidney Tissue Grafts
Source: MDPI journal article supplement (doi:10.3390/bioengineering10111261), 2023-10-29
Supplement: s1 [file s1]

**Table S1:** Antibodies and lectins used in this study

| <b>Antigen</b>     | <b>Vendor</b>                        | <b>Catalog number</b> | <b>Dilution</b> |
|--------------------|--------------------------------------|-----------------------|-----------------|
| Collagen I         | Rockland                             | 600-401-103           | 1:100           |
| Collagen III       | Rockland                             | 600-401-105           | 1:100           |
| Collagen V         | SouthernBiotech                      | 1350-01               | 1:100           |
| Collagen VI        | SouthernBiotech                      | 1360-01               | 1:100           |
| F4/80              | Santa Cruz Biotechnology             | SC52664               | 1:100           |
| Fibronectin        | Millipore Sigma                      | F3648                 | 1:100           |
| Tenascin C         | Millipore Sigma                      | T3413                 | 1:100           |
| Laminin            | Millipore Sigma                      | L9393                 | 1:100           |
| Cytokeratin 8      | Developmental Studies Hybridoma Bank | TROMA-I               | 1:100           |
| Uromodulin         | Meridian Life Science                | K90071C               | 1:100           |
| Uromodulin         | R&D Systems                          | MAB5144               | 1:100           |
| Rabbit Ig-Alexa488 | ThermoFisher                         | A-21206               | 1:200           |
| Goat Ig-Alexa568   | ThermoFisher                         | A-11057               | 1:200           |
| Rat Ig-Alexa488    | ThermoFisher                         | A-4269                | 1:200           |
| Sheep Ig-HRP       | Jackson Immunochemicals              | 713-035-003           | 1:10,000        |
| Mouse Ig-HRP       | Biorad                               | 0300-0108P            | 1:10,000        |
| <b>LECTIN</b>      |                                      |                       |                 |
| Lotus lectin-FITC  | Vector Laboratories                  | FL-1321-2             | 1:200           |



**Figure S1:** Method and data sources for comparison of healthy human urinary proteome versus human kidney organoid transcriptomes

## Approach to identifying candidates from proteome and transcriptome datasets

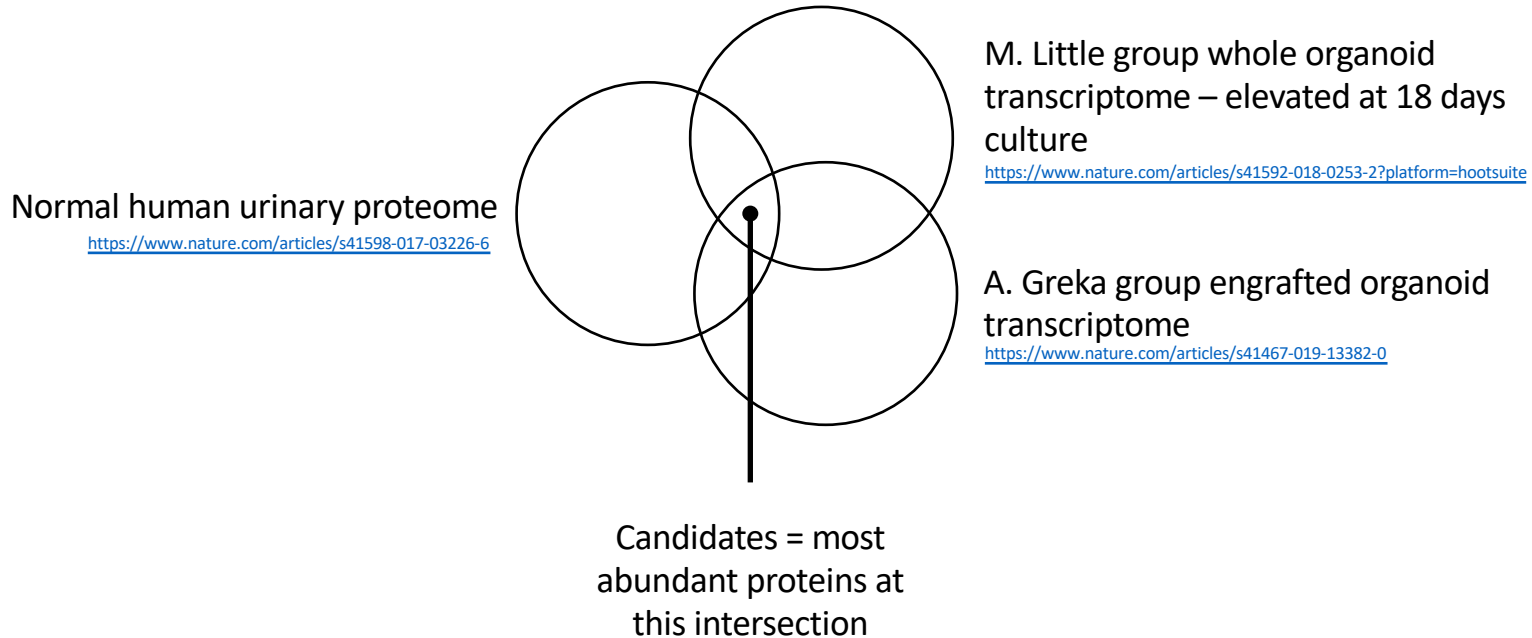



# Top 50 hits in each dataset ranked by abundance

## Urinary proteome

|    | Accession | Name                                                                                                    | MW       | IBAQ value | Relative Abundance |
|----|-----------|---------------------------------------------------------------------------------------------------------|----------|------------|--------------------|
| 1  | ALB       | Serum albumin OS=Homo sapiens GN=ALB PE=1 SV=2                                                          | 6.93E+04 | 4.25E+06   | 2.94E+11           |
| 2  | UMOD      | Uromodulin OS=Homo sapiens GN=UMOD PE=1 SV=1                                                            | 6.97E+04 | 1.18E+06   | 2.91E+11           |
| 3  | AMBP      | Protein AMBP OS=Homo sapiens GN=AMBP PE=1 SV=1                                                          | 3.90E+04 | 2.70E+06   | 1.05E+11           |
| 4  | IGKC      | Ig kappa chain C region OS=Homo sapiens GN=IGKC PE=1 SV=1                                               | 1.16E+04 | 7.83E+06   | 9.09E+10           |
| 5  | KNG1      | Kininsogen-1 OS=Homo sapiens GN=KNG1 PE=1 SV=2                                                          | 7.19E+04 | 1.02E+06   | 7.35E+10           |
| 6  | IGHG2     | Ig gamma-2 chain C region OS=Homo sapiens GN=IGHG2 PE=1 SV=2                                            | 3.59E+04 | 1.85E+06   | 6.63E+10           |
| 7  | IGHG1     | Ig gamma-1 chain C region OS=Homo sapiens GN=IGHG1 PE=1 SV=1                                            | 3.61E+04 | 1.60E+06   | 5.78E+10           |
| 8  | APOD      | Apolipoprotein D OS=Homo sapiens GN=APOD PE=1 SV=1                                                      | 2.13E+04 | 2.35E+06   | 5.00E+10           |
| 9  | PTGDS     | Prostaglandin-H2 D-isomerase OS=Homo sapiens GN=PTGDS PE=1 SV=1                                         | 2.10E+04 | 2.22E+06   | 4.68E+10           |
| 10 | SPP1      | Osteopontin OS=Homo sapiens GN=SPP1 PE=1 SV=1                                                           | 3.54E+04 | 1.29E+06   | 4.57E+10           |
| 11 | CD59      | CD59 glycoprotein OS=Homo sapiens GN=CD59 PE=1 SV=1                                                     | 1.42E+04 | 2.96E+06   | 4.19E+10           |
| 12 | IGHG3     | Ig gamma-3 chain C region OS=Homo sapiens GN=IGHG3 PE=1 SV=2                                            | 4.13E+04 | 9.25E+05   | 3.82E+10           |
| 13 | HSPG2     | Basement membrane-specific heparan sulfate proteoglycan core protein OS=Homo sapiens GN=HSPG2 PE=1 SV=2 | 4.69E+05 | 7.94E+04   | 3.72E+10           |
| 14 | NRD2      | Protein NDRG2 OS=Homo sapiens GN=NRD2 PE=1 SV=2                                                         | 4.08E+04 | 9.05E+05   | 3.69E+10           |
| 15 | IGHA1     | Ig alpha-1 chain C region OS=Homo sapiens GN=IGHA1 PE=1 SV=2                                            | 3.76E+04 | 8.44E+05   | 3.17E+10           |
| 16 | EGF       | Pro-epidermal growth factor OS=Homo sapiens GN=EGF PE=1 SV=2                                            | 1.34E+05 | 2.35E+05   | 3.15E+10           |
| 17 | IGHG4     | Ig gamma-4 chain C region OS=Homo sapiens GN=IGHG4 PE=1 SV=1                                            | 3.59E+04 | 8.31E+05   | 2.98E+10           |
| 18 | RNASE2    | Non-secretory ribonuclease OS=Homo sapiens GN=RNASE2 PE=1 SV=2                                          | 1.83E+04 | 1.60E+06   | 2.93E+10           |
| 19 | TIH4      | Inter-alpha-trypsin inhibitor heavy chain H4 OS=Homo sapiens GN=TIH4 P                                  | 1.03E+05 | 2.72E+05   | 2.81E+10           |
| 20 | VASN      | Vasorin OS=Homo sapiens GN=VASN PE=1 SV=1                                                               | 7.17E+04 | 3.85E+05   | 2.76E+10           |
| 21 | PIK3P1    | Phosphoinositide-3-kinase-interacting protein 1 OS=Homo sapiens GN=PIK3P1                               | 2.82E+04 | 9.54E+05   | 2.69E+10           |
| 22 | AMY2A     | Pancreatic alpha-amylase OS=Homo sapiens GN=AMY2A PE=1 SV=2                                             | 5.77E+04 | 4.15E+05   | 2.39E+10           |
| 23 | AZGP1     | Zinc-alpha-2-glycoprotein OS=Homo sapiens GN=AZGP1 PE=1 SV=2                                            | 3.42E+04 | 5.98E+05   | 2.05E+10           |
| 24 | ORM1      | Alpha-1-acid glycoprotein 1 OS=Homo sapiens GN=ORM1 PE=1 SV=1                                           | 2.35E+04 | 8.51E+05   | 2.00E+10           |
| 25 | KRT13     | Keratin, type I cytoskeletal 13 OS=Homo sapiens GN=KRT13 PE=1 SV=4                                      | 4.96E+04 | 3.52E+05   | 1.75E+10           |
| 26 | PSAP      | Proactivator polypeptide OS=Homo sapiens GN=PSAP PE=1 SV=2                                              | 5.81E+04 | 2.73E+05   | 1.58E+10           |
| 27 | KLC1      | Kallikrein-1 OS=Homo sapiens GN=KLC1 PE=1 SV=2                                                          | 2.80E+04 | 5.33E+05   | 1.54E+10           |
| 28 | SERPINA5  | Plasma serine protease inhibitor OS=Homo sapiens GN=SERPINA5 PE=1 SV=1                                  | 4.56E+04 | 3.36E+05   | 1.53E+10           |
| 29 | WFDC2     | WAP four-disulfide core domain protein 2 OS=Homo sapiens GN=WFDC2 P                                     | 1.30E+04 | 1.18E+06   | 1.53E+10           |
| 30 | TF        | Serotransferrin OS=Homo sapiens GN=TF PE=1 SV=3                                                         | 7.70E+04 | 1.88E+05   | 1.44E+10           |
| 31 | SECTM1    | Secreted and transmembrane protein 1 OS=Homo sapiens GN=SECTM1 PE=1 SV=1                                | 2.70E+04 | 5.17E+05   | 1.40E+10           |
| 32 | MASP2     | Mannan-binding lectin serine protease 2 OS=Homo sapiens GN=MASP2 PE=1 SV=1                              | 7.57E+04 | 1.77E+05   | 1.34E+10           |
| 33 | CD44      | CD44 antigen OS=Homo sapiens GN=CD44 PE=1 SV=3                                                          | 8.15E+04 | 1.64E+05   | 1.34E+10           |
| 34 | SERPINC1  | Plasma protease C1 inhibitor OS=Homo sapiens GN=SERPINC1 PE=1 SV=2                                      | 5.51E+04 | 2.42E+05   | 1.34E+10           |
| 35 | CUBN      | Cubilin OS=Homo sapiens GN=CUBN PE=1 SV=5                                                               | 3.98E+05 | 3.27E+04   | 1.30E+10           |
| 36 | LMAN2     | Vesicular integral-membrane protein VIP36 OS=Homo sapiens GN=LMAN2                                      | 4.02E+04 | 3.20E+05   | 1.29E+10           |
| 37 | CLU       | Clusterin OS=Homo sapiens GN=CLU PE=1 SV=1                                                              | 5.25E+04 | 2.38E+05   | 1.25E+10           |
| 38 | KRT4      | Keratin, type II cytoskeletal 4 OS=Homo sapiens GN=KRT4 PE=1 SV=4                                       | 5.72E+04 | 2.16E+05   | 1.23E+10           |
| 39 | RNASE1    | Ribonuclease pancreatic OS=Homo sapiens GN=RNASE1 PE=1 SV=4                                             | 1.76E+04 | 6.99E+05   | 1.23E+10           |
| 40 | AHS5      | Alpha-2-HS-glycoprotein OS=Homo sapiens GN=AHS5 PE=1 SV=1                                               | 3.93E+04 | 3.00E+05   | 1.18E+10           |
| 41 | PIGR      | Polymeric immunoglobulin receptor OS=Homo sapiens GN=PIGR PE=1 SV=1                                     | 8.32E+04 | 1.39E+05   | 1.16E+10           |
| 42 | GAA       | Lysosomal alpha-glucosidase OS=Homo sapiens GN=GAA PE=1 SV=4                                            | 1.05E+05 | 9.63E+04   | 1.01E+10           |
| 43 | F2        | Prothrombin OS=Homo sapiens GN=F2 PE=1 SV=2                                                             | 7.00E+04 | 1.44E+05   | 1.01E+10           |
| 44 | GSN       | Gelsolin OS=Homo sapiens GN=GSN PE=1 SV=1                                                               | 8.56E+04 | 1.18E+05   | 1.01E+10           |
| 45 | PGA3      | Pepsin A-3 OS=Homo sapiens GN=PGA3 PE=1 SV=1                                                            | 4.19E+04 | 2.24E+05   | 9.40E+09           |
| 46 | KRT1      | Keratin, type I cytoskeletal 1 OS=Homo sapiens GN=KRT1 PE=1 SV=6                                        | 6.60E+04 | 1.18E+05   | 9.12E+09           |
| 47 | LGALS3BP  | Galectin-3-binding protein OS=Homo sapiens GN=LGALS3BP PE=1 SV=1                                        | 6.53E+04 | 1.37E+05   | 8.97E+09           |
| 48 | RPS12     | 40S ribosomal protein S12 OS=Homo sapiens GN=RPS12 PE=1 SV=3                                            | 1.45E+04 | 6.17E+05   | 8.95E+09           |
| 49 | YIPF3     | Protein YIPF3 OS=Homo sapiens GN=YIPF3 PE=1 SV=1                                                        | 3.82E+04 | 2.31E+05   | 8.82E+09           |

Red text = hits represented in cultured organoid and implanted organoid transcriptomes

Candidates selected for further analysis

Spp1 = osteopontin

CD59 = MAC inhibitory protein

HSPG2 = perlecan

PSAP = prosaposin

CUBN = cubulin
